1 **Full title:**

2 In exogenous attention, time is the clue: brain and heart interactions to survive  
3 threatening stimuli

4  
5 **Short title:**

6 Brain and heart interactions to survive threat

7  
8  
9 **Authors:**

10 Elisabeth Ruiz-Padial<sup>1\*</sup>

11 Francisco Mercado<sup>2</sup>

12  
13  
14 <sup>1</sup> Departament of Psychology, University of Jaén, Jaén, Spain

15 <sup>2</sup> Unit of Clinical Psychology, Faculty of Health Sciences, Rey Juan Carlos University,  
16 Alcorcón, Madrid, Spain.

17  
18 **\*Corresponding author:**

19 E-mail: erpadial@ujaen.es

20  
21 **Author Contributions:**

22 Conceptualization: Elisabeth Ruiz-Padial.

23 Data Curation: Elisabeth Ruiz-Padial.

24 Formal Analysis: Francisco Mercado

25 Funding Acquisition: Elisabeth Ruiz-Padial, Francisco Mercado

26 Investigation: Elisabeth Ruiz-Padial.

27 Methodology: Elisabeth Ruiz-Padial, Francisco Mercado

28 Project Administration: Elisabeth Ruiz-Padial

29 Resources: Elisabeth Ruiz-Padial

30 Software: Elisabeth Ruiz-Padial, Francisco Mercado

31 Supervision: Elisabeth Ruiz-Padial

32 Validation: Elisabeth Ruiz-Padial, Francisco Mercado

33 Writing-Original Draft Preparation: Elisabeth Ruiz-Padial, Francisco Mercado

34 Writing-Review & Editing: Elisabeth Ruiz-Padial, Francisco Mercado.

## 35 **Abstract**

36 The capture of exogenous attention by negative stimuli has been interpreted as adaptive  
37 for survival in a diverse and changing environment. In the present paper, we investigate  
38 the neural responses towards two discrete negative emotions with different biological  
39 meanings, disgust and fear, and its potential relationships with heart rate variability  
40 (HRV) as an index of emotional regulation. With that aim, 30 participants performed a  
41 digit categorization task while fear, disgust and neutral distractor pictures were  
42 presented. Resting HRV at baseline, behavioral responses, and event-related potentials  
43 were recorded. Whereas P1 amplitudes were highest to fear distractors, the disgust  
44 stimulation led to augmented P2 amplitudes compared to the rest of distractors.  
45 Interestingly, increased N2 amplitudes were also found to disgust distractors, but only  
46 in high HRV participants. Neural source estimation data point to the involvement of the  
47 insula in this exogenous attentional response to disgust. Additionally, disgust distractors  
48 provoked longer reaction times than fear and neutral distractors in the high HRV group.  
49 Present findings are interpreted in evolutionary terms suggesting that exogenous  
50 attention is captured by negative stimuli following a different time course for fear and  
51 disgust. Possible HRV influences on neural mechanisms underlying exogenous  
52 attention are discussed considering the potential important role of this variable in  
53 emotional regulation processes.

54

55

56

57

58

59

60

61

## 62 **Introduction**

63 To process the great amount of sensorial stimulation that continuously surrounds the  
64 individual a fast and precise brain selection is required in order to identify relevant  
65 signals from the environment such as those are important for survival to face them with  
66 an appropriate action (e.g., [1]). Growing experimental evidence coming from both  
67 electrophysiological [2-7] and behavioral studies [8-11] has consistently shown that  
68 threatening information is capable to efficiently attract attentional resources in a rapid  
69 and automatic way (i.e., exogenous attention) when these stimuli appeared as distractors  
70 in a given visual task (for a review see [12]).

71 A new line of evidence has focused its efforts on exploring exogenous  
72 attentional responses to each type of negative-arousing events (i.e., fearful and  
73 disgusting) considering them as separate categories due to the subjective feelings related  
74 to each of them, their biological meaning, and even their neural substrate and effect on  
75 the peripheral nervous system are segregated [13-15]. Indeed, exogenous attention to  
76 affective events triggers fast neural responses reflected by enhanced amplitudes to  
77 threatening distractors in event-related potential (ERP components within the first 200  
78 ms (P1, P2 and N2) from the stimulus onset [9]. In this sense, previous ERP studies  
79 have found neural indices (P2 wave) describing that disgust distractors are more  
80 efficient at attracting automatic attention than fearful distractors [14]. This segregated  
81 pattern between disgust and fear was also found when neural activation within visual  
82 regions (i.e., cuneus) was measured. More recently, Zhang and colleagues [16] using a  
83 dot-probe paradigm showed a clear attentional modulation of the N1 component in  
84 response to disgust stimuli being interpreted as a rapid suppression of attention to  
85 diminish risk of contamination.

86 With respect to peripheral physiological responses, research has consistently found that  
87 disgust produces greater heart rate (HR) deceleration compared to fear and neutral  
88 stimuli [17-20]. In fact, it has been proposed that this greater HR deceleration to  
89 disgusting stimuli would be specifically associated with the involvement of  
90 parasympathetic activation [17]. We have previously shown that startle and HR  
91 responses during fear and disgust pictures are modulated by vagally mediated heart rate  
92 variability (HRV). Participants with high HRV showed the expected startle magnitude  
93 increase to unpleasant foreground while the group with low HRV did not [21-22], and  
94 deeper cardiac deceleration to disgusting compared to fear-evoking or neutral distractors  
95 [23].

96 The importance of the bidirectional interactions between the heart and brain has  
97 been known for over 100 years [24]. HRV has been proposed as an index of the  
98 dynamics of brain–heart connections [25]. Specifically, vagal regulation of the heart  
99 indicates highly functional prefrontal inhibition of subcortical structures since the neural  
100 circuits bidirectionally connecting the prefrontal cortex with subcortical structures are  
101 linked to the heart via the vagus nerve [26-28]. High HRV has been associated with  
102 better affective and attentional regulation as indicated by, for example, larger orienting  
103 responses but faster habituation to nonthreatening stimuli [29] and adaptive emotional  
104 startle modulation [30]. However, low HRV has been related to hyperactive subcortical  
105 activity, which results in poor self-regulatory functions, such as the failure to recognize  
106 safety cues or to habituate to novel, neutral stimuli [26, 29, 31-32].

107 Closely connected to the present study, HRV has been recently related to the  
108 capture of automatic attention by emotional stimuli. Park et al [33] asked their  
109 participants to detect a target letter among a string of letters superimposed on either  
110 fearful or neutral distractor faces. Their results showed that neutral and fearful faces

111 interfered with the performance of the primary task in the low HRV group whereas in  
112 the high HRV group the interference was observed only to the fearful faces. Park et al  
113 [34] showed faster attentional engagement to fearful faces in low HRV than in high  
114 HRV participants what was considered dysfunctional. These findings together suggest  
115 that only high HRV participants showed an adaptive response.

116 Despite ERPs are considered as a suitable tool to explore rapid neural responses  
117 occurring at early attentional processing stages, such as exogenous attention, its study to  
118 characterize segregated neural substrates related to fear and disgust as a function of  
119 individual differences in resting HRV has not been explored. Furthermore, the use of  
120 mixed experimental paradigms in studies on exogenous attention to disgust and fear  
121 stimuli has led to obtain inconclusive outcomes that hinder the possibility to shed light  
122 on the underlying mechanisms for explaining this segregation still under debate.

123 Therefore, the present experiment will examine whether negative stimuli (i.e.,  
124 fearful vs. disgusting) can be differently prioritized in the attentional processing at a  
125 neural level occurring “automatically” and whether they could be modulated by HRV  
126 influences. Neural responses will be recorded using a high-temporal resolution  
127 technique (ERPs) to characterize temporal dynamics of exogenous attention toward  
128 emotional distractors during a concurrent but distinct target distractor paradigm. The  
129 use of this paradigm where target stimulation (on which voluntary attention should be  
130 devoted to accomplish a given task) and task-irrelevant information (emotional  
131 distractors) are distinct but appear at the same time has been considered optimal to  
132 investigate attentional capture mechanisms [12]. Advanced source estimation tools will  
133 also be applied. On these findings we will try to build an explanation of how brain–  
134 heart connections may modulate the triggering of exogenous attention to different types

135 of relevant environmental events, specifically when threat-related stimulation appears  
136 (fearful vs. disgust).

137

## 138 **Methods**

### 139 **Subjects**

140 Thirty undergraduate students (14 male) from the Universidad de Jaén, with an age  
141 range of 18–26 years old (mean = 21.67, standard deviation = 2.22), voluntarily  
142 participated in this experiment. All subjects gave written informed consent and reported  
143 normal or corrected-to-normal visual acuity. The Ethics Committee of the Universidad  
144 de Jaén approved the study.

145

### 146 **Stimuli and procedure**

147 The experimental paradigm used in this experiment comprised of the presentation of  
148 visual stimuli which were composed of two different elements that appeared at the same  
149 time on a computer screen: 1) thirty emotional pictures which were used as task-  
150 irrelevant stimuli (distractors); and 2) a set of two digits located at the center of each  
151 picture being the elements to which participants were asked to voluntarily attend for  
152 performing an experimental task (targets). Thus, all participants completed a digit  
153 categorization task while they were exposed to three types of distractor pictures: fearful  
154 (F), disgusting (D), and emotionally neutral (N). Emotional pictures were selected from  
155 two main sources, the International Affective Picture System (IAPS) [35] and  
156 Emomadrid [36] on the basis of an independent rating study. Ten pictures conveying  
157 fear (IAPS 1525, 1932, 2692, 6190, 6244, 6350, 6510, 9622 and Emomadrid 0578,  
158 0579), disgust (IAPS 9373, 9830 and Emomadrid 0563, 0564, 0569, 0574, 0586 and

159 supplemented with similar pictures found from publicly available sources) and neutral  
160 (IAPS 1910, 2512, 2580, 7000 and Emomadrid 0334, 0337, 0338, 0339, 0414, 0584)  
161 affective meaning were used. The size for all stimuli was 75.17° (width) and 55.92°  
162 (height). Each of these pictures contained two central digits (4.93° height) colored in  
163 yellow and outlined in solid black so they were clearly distinguished from the  
164 background. As illustrated in Fig. 1, each picture was displayed on the screen for 350  
165 ms and stimulus onset asynchrony was always 3000 ms. The experimental task was  
166 exclusively related to the central digits, which could be both even, both odd or one even  
167 and the other odd. Participants had to categorize them “as accurately and rapidly as  
168 possible”, as congruent or incongruent (in even/odd condition) by pressing different  
169 buttons. One key was pressed by the participants if both digits were even or if both were  
170 odd (i.e., if they were “congruent”), and a different key if one central digit was even and  
171 the other was odd (i.e., if they were “incongruent”). Twenty combinations of digits were  
172 composed, half of them being congruent and the other half incongruent. The whole  
173 experimental procedure included a total of 120 trials (40 trials for each type of  
174 emotional distractor) divided into three blocks (fear, disgust, and neutral). The same  
175 combination of digits was repeated across emotional conditions in order to ensure that  
176 task difficulty was the same for F, N, and D and were presented in semi-random order  
177 into each block of trials in such a way that the congruent or incongruent conditions  
178 never appeared more than twice consecutively. The order of the blocks was  
179 counterbalanced across subjects. Each picture was presented through a CRT screen four  
180 times along the study (twice for both congruent and incongruent trials). Participants  
181 were placed in an electrically shielded, sound-attenuated room and they were instructed  
182 to continuously look at a fixation mark located in the center of the screen and to blink  
183 only after a beep that sounded 1300 ms after each stimulus onset.

184

185 **Fig 1. Example of the sequence of events in disgust (a), neutral (b), and fear (c)**  
186 **block of trials.**

187

188 Images used as distractors were selected from an independent pilot study  
189 according to their assessments in valence and arousal (the two main dimensions  
190 explaining the principal variance of emotional information), which were similar for fear  
191 and disgust categories. Additionally, a subjective criterion was also applied to select  
192 pictures representing either fear or disgust images avoiding stimuli combining both  
193 emotions.

194 After the recording session, participants filled out a multidimensional scale for  
195 each picture in order to confirm that their assessments on the valence (1, negative to 5,  
196 positive), arousal (1, relaxing to 5, arousing), fearfulness (1, minimum to 5, maximum),  
197 and disgustingness (1, minimum to 5, maximum) content of the stimulation were those  
198 assumed a priori (see Table 1). One-way repeated measured ANOVAs were performed  
199 using stimuli (three levels: D, N, and F) as a factor. In order to test the significance of  
200 pairwise contrasts, a Bonferroni test was applied. Fearfulness was significantly higher  
201 for F than for D stimuli, and disgustingness was significantly higher for D than for F  
202 stimuli ( $p < 0.05$  in both cases). Both valence and arousal were higher for F than for D  
203 pictures ( $p < 0.01$  in both cases). N stimuli were significantly lower in fearfulness,  
204 disgustingness, valence, and arousal than were F and D stimuli ( $p < 0.01$ ).

205

206 **Table 1. Means and standard deviations (in parenthesis) for the valence, arousal,**  
207 **fearfulness and disgustingness of the emotional distractors (fear, disgust neutral)**



208 **evaluated by the whole sample of participants. Information about ANOVA p-**  
209 **values for each statistical contrast is included.**

---

|                | Fear         | Disgust      | Neutral      | p-value |
|----------------|--------------|--------------|--------------|---------|
| Valence        | 2.066 (.501) | 1.761 (.386) | 3.264 (.241) | <.001   |
| Arousal        | 4.130 (.378) | 3.466 (.458) | 2.735 (.274) | <.001   |
| Fearfulness    | 3.240 (.876) | 1.329 (.335) | 1.040 (.119) | <.001   |
| Disgustingness | 1.316 (.381) | 3.323 (.675) | 1.109 (.146) | <.001   |

---

210

211

## 212 **EEG recording and pre-processing**

213 Continuous electroencephalographic (EEG) activity was recorded using an electrode  
214 cap (ElectroCap International) with 28 homogeneously distributed scalp electrodes. All  
215 electrodes were referenced to the nose tip electrode. Electrooculographic (EOG) data  
216 were recorded supra- and infra-orbitally (vertical EOG), as well as from the left versus  
217 right orbital rim (horizontal EOG). Electrode impedances were kept below 5 k $\Omega$ . An  
218 online bandpass filter from 0.3 Hz to 40 KHz was used (3 dB points for -6dB/octave  
219 roll-off), and the digitization sampling rate was set to 500 Hz. Off-line pre-processing  
220 was performed using Brain Vision Analyzer software (Brain Products). The continuous  
221 EEG recording was divided into 900 ms epochs for each trial, beginning 200 ms before  
222 stimulus onset. Baseline correction was made using the 200 ms period prior to the onset  
223 of the stimulus. Trials in which subjects responded erroneously or did not respond were  
224 eliminated. A careful visual inspection was then carried out where epochs with eye  
225 movements or blinks were eliminated. This artifact and error rejection led to the average  
226 acceptance of 27 disgusting, 27.9 neutral, and 27 fearful distractor trials. The number of

227 trials did not statistically differ among distractor types. The ERP averages were  
228 categorized according to each distractor type: fear, disgust and neutral.

229

## 230 **HRV recording and pre-processing**

231 Resting HRV was obtained from the electrocardiogram (ECG) data recorded using three  
232 Ag-AgCl electrodes placed following lead II through a Biopac MP100 system in  
233 baseline, just before the experimental task and the EEG recording started. The ECG was  
234 sampled at 1000 Hz and the beat-to-beat HR data were extracted through Acknowledge  
235 3.9 software. This process yielded a baseline interbeat interval time series of seven  
236 minutes duration (longer than the one minute recommended as the minimum necessary  
237 according to the Task Force guidelines [37]. Frequency domain analyses were  
238 performed on these data using a custom HRV package. Spectral analyses using an  
239 autoregressive algorithm following the Task Force guidelines [37] were performed. The  
240 frequency domain measure of high frequency (HF: 0.15–0.4) power that has been  
241 associated with respiratory-modulated parasympathetic outflow was used to index  
242 vagally mediated HRV. Spectral estimates of power ( $\text{ms}^2$ ) were transformed  
243 logarithmically (base 10) to normalize the distribution of scores. Two independent  
244 groups of participants were formed on the basis of a median split on their baseline  
245 logHF [median = 4.94; low HRV = 3.9 (s.d. = 0.93); high HRV = 5.7 (s.d.= 0.48)] as it  
246 has been recommended [38] and extensively used [21, 23, 34, 39].

247

## 248 **Data analysis**

### 249 **Behavioral analysis**

250 Mean reaction times (RTs) of correct responses and error rates derived from the task  
251 were analyzed. Repeated-measures ANOVAs on each measure were computed using

252 emotional pictures (three levels: F, D, and N) and group of HRV (two levels: high and  
253 low) as factors. The Greenhouse–Geisser epsilon correction was applied to adjust the  
254 degrees of freedom of the F ratios where necessary, and post hoc comparisons to  
255 determine the significance of pairwise contrasts were performed using the Bonferroni  
256 procedure ( $\alpha < 0.05$ ). As a measure of effect size, partial  $\eta$ -square ( $\eta^2_p$ ) is reported  
257 for significant effects.

258

### 259 **ERP analysis**

260 Detection and quantification of ERP components was carried out through covariance-  
261 matrix-based temporal principal component analysis (tPCA) explaining most of the  
262 brain electrical activity variance. This technique has been strongly recommended for  
263 these tasks since its application avoids the subjectivity of selecting “time windows of  
264 interest” based on visual inspection for analyses of grand-averaged ERPs. It can lead to  
265 several types of misinterpretation, especially when high-density montages are employed  
266 (see [40] for a more detailed description of the tPCA procedure and its advantages). The  
267 main advantage of tPCA is that it represents each ERP component with its “clean”  
268 shape, extracting and quantifying it free of the influences of adjacent or subjacent  
269 components [40-41]. Indeed, the waveform recorded at a site on the head over a period  
270 of several hundreds of milliseconds represents a complex superposition of different  
271 overlapping electrical potentials. Such recordings can stymie visual inspection. In brief,  
272 tPCA computes the covariance between all ERP time points, which tends to be high  
273 between those time points involved in the same component, and low between those  
274 belonging to different components. The solution is therefore a set of independent factors  
275 made up of highly covarying time points, which ideally correspond to ERP components.  
276 *Temporal factor scores*, the tPCA-derived parameter in which extracted temporal

277 factors may be quantified, is linearly related to amplitude. In the present study, the  
278 decision on the number of components to select was based on the scree test [42].  
279 Extracted components were submitted to promax rotation, as recently recommended  
280 [43].

281 As previously mentioned, the analyses required that the ERPs be recorded at 28  
282 globally distributed scalp points. Signal overlapping may also occur at the space  
283 domain. At any given time point, several neural processes (and hence, several electrical  
284 signals) may concur, and the recording at any scalp location at that moment is the  
285 electrical balance of these different neural processes. Thus, ERP components frequently  
286 behave differently in some scalp areas to others (e.g., present opposite polarity). While  
287 tPCA allows solving temporal overlapping of ERP components, spatial PCA (sPCA)  
288 separates ERP components along the space. In this sense, each spatial factor would  
289 ideally reflect one of the concurrent neural processes underlying each temporal factor.  
290 Therefore, this configuring and quantifying scalp region system is preferable to an a  
291 priori subdivision into fixed scalp regions for all components, as sPCA demarcates scalp  
292 regions according to the real behavior of each scalp-point recording (basically, each  
293 region or spatial factor is formed with scalp points where recordings tend to covary).  
294 Consequently, the shape of the sPCA-configured regions is functionally based, and  
295 scarcely resembles the shape of the traditional, geometrically configured regions.  
296 sPCAs were carried out for each of the temporal factors. This regional grouping was  
297 determined through a covariance matrix-based spatial PCA. Moreover, each spatial  
298 factor can be quantified through the *spatial factor score*, a single parameter that reflects  
299 the amplitude of the whole spatial factor. Additionally, in this case, the decision on the  
300 number of factors to extract was based on the scree test. Extracted spatial factors were

301 submitted to promax rotation. This analysis procedure, comprising of both tPCA and  
302 sPCA, has been recommended for exploring emotional processing through ERPs [44].

303 Finally, repeated-measures ANOVAs on temporospatial factor scores were  
304 carried out with respect to emotional pictures (three levels: F, D, and N) and HRV  
305 group (two levels: high and low). The Greenhouse–Geisser epsilon correction was  
306 applied to adjust the degrees of freedom of the F ratios where necessary, and post hoc  
307 comparisons to determine the significance of pairwise contrasts were performed using  
308 the Bonferroni procedure ( $\alpha < 0.05$ ). Effect sizes were also reported using the  
309 partial  $\eta$ -square ( $\eta^2_p$ ) method.

### 310 **Source estimation analysis**

311 In order to three-dimensionally explore cortical regions that could account for  
312 the experimental effects at the scalp level, exact low-resolution brain electro-magnetic  
313 tomography (eLORETA) [45-46] was applied to relevant temporal factor scores in  
314 accordance with the ANOVA results, as it will be explained later. eLORETA is a 3D,  
315 discrete linear solution for the EEG inverse problem [47] which refers to a three-shell  
316 spherical model registered to the MNI305 digitized structural human brain atlas  
317 template. Solutions are given, therefore, in three coordinates: “x” is the distance in  
318 millimeters to the right (+) or left (–) of midline; “y” is the distance anterior (+) or  
319 posterior (–) to the anterior commissure; and “z” is the distance above (+) or below (–)  
320 a horizontal plane through the anterior and posterior commissures. Although, in general,  
321 solutions provided by EEG-based source location algorithms should be interpreted with  
322 caution due to their potential error margins, LORETA solutions have shown significant  
323 correspondence with those provided by hemodynamic procedures in the same tasks [48-  
324 50]. In the present experiment, we tried to minimize this potential error margin using  
325 the tPCA-derived factor scores instead of voltages. This strategy has provided more

326 accurate source estimation analyses [2, 51]. In its current version, eLORETA computes  
327 the current density at each of 6239 voxels mainly located in the cortical gray matter and  
328 the hippocampus of the digitized Montreal Neurological Institute (MNI) standard brain.

329 Therefore, in order to identify the brain regions underlying exogenous attention  
330 processes triggered by emotional stimulation, three-dimensional current density  
331 estimates for relevant temporal factor scores that were sensitive to experimental  
332 manipulations according to ERP results were computed for each participant and each  
333 experimental condition. Subsequently, the voxel-based whole-brain eLORETA-images  
334 (6239 voxels) were compared among three experimental conditions (F, D, and N:  
335 emotional distractors). To that aim, eLORETA built-in voxelwise randomization tests  
336 (5000 permutations) based on a statistical non-parametric mapping methodology were  
337 used. As explained by Nichols and Holmes [52], the non-parametric methodology  
338 inherently avoids multiple comparison-derived problems and does not require any  
339 assumption of normality. Voxels that showed significant differences between conditions  
340 (log-F-ratio statistic, two-tailed corrected  $p < 0.05$ ) were located in anatomical regions  
341 and Brodmann areas (BAs). In order to explore exogenous attentional processing related  
342 to the three types of emotional distractors (three levels: F, D, and N) and the two groups  
343 of HRV (two levels: high and low), current densities of different regions of interest  
344 (ROIs; radius = 5 mm) were submitted to ANOVAs.

345

## 346 **Results**

### 347 **Behavioral results**

348 Average values for RTs and error rates for each emotional distractor are shown in Table  
349 2. Two separate repeated-measures ANOVAs were conducted on RTs and error rates  
350 including emotional distractor (three levels: F, D, and N) and HRV group (two levels:

351 high and low) as factors. Although both RTs and error rates for D stimuli were slowest  
 352 and highest, as it can be observed in Fig. 2, a significant main effect of emotional  
 353 distractor was only found for error rates [ $F(1.91,53.53) = 3.297, p = .047, \eta^2 = 0.105$ ]  
 354 but not for RTs [ $F(1.82,50.85) = 3.075, p = .06$ ]. Disgusting distractors provoked higher  
 355 error rates than neutral distractors ( $p < 0.05$ ). There was no significant main effect for  
 356 HRV group (RTs [ $F(1,28) = 2.413, p = .132$ ]; error rates [ $F(1,28) = .093, p = .763$ ]).  
 357 Finally, the interaction between emotional distractor and HRV was significant for RTs  
 358 [ $F(1.82,50.85) = 5.419, p = .009, \eta^2 = .162$ ] but not for error rates [ $F(1.91,53.53) = .336,$   
 359  $p = .706$ ]. Posterior analysis conducted on this interaction revealed slower RTs to D  
 360 distractors compared to N ( $p = .01$ ) and F stimuli ( $p = .04$ ) in the high HRV group.  
 361 Additionally, low HRV group showed faster RTs to F distractors compared to D ( $p =$   
 362  $.048$ ) and N ( $p = .01$ ).

363

364 **Table 2. Means and standard deviations (in parenthesis) of RTs and errors rates to**  
 365 **disgust, neutral and fearful distractors.**

|              |          | Disgust               | Neutral               | Fear                  |
|--------------|----------|-----------------------|-----------------------|-----------------------|
| RTs          | High HRV | 1163.209<br>(259.847) | 1079.277<br>(223.196) | 1112.146<br>(243.435) |
|              | Low HRV  | 1006.353<br>(198.167) | 1038.759<br>(176.714) | 956.964<br>(187.165)  |
|              | Total    | 1084.781<br>(240.660) | 1059.018<br>(198.870) | 1034.555<br>(227.482) |
| Errors Rates | High HRV | 7.867 (4.138)         | 5.667 (2.895)         | 6.933 (3.693)         |
|              | Low HRV  | 7.133 (3.248)         | 5.933 (4.234)         | 6.333 (4.467)         |
|              | Total    | 7.500 (3.674)         | 5.800 (3.566)         | 6.633 (4.038)         |

366

367

368 **Fig 2. Number of errors (a) and reaction times (b) related to the different**  
369 **emotional distractors in each HRV group.** Error bars = standard errors.

370

### 371 **ERP results**

372 Grand averages related to exogenous attentional brain responses for the three emotional  
373 distractors, once the baseline value (pre-stimulus recording) has been subtracted from  
374 each ERP, are displayed in Fig. 3. This figure mainly shows ERP activity (P1, P2, and  
375 N2) where the most relevant experimental effects related to attentional capture  
376 processes are clearly appreciable. These effects will be subsequently detailed.

377

378 **Fig. 3. Grand averages related to exogenous attentional ERP responses (P1, P2 and**  
379 **N2) for the three emotional distractors.**

380

381 As a consequence of the tPCA application, eight temporal factors (TFs) were  
382 extracted from the ERPs (see Fig. 4). Extracted factors explained 83.79% of the total  
383 variance. According to the factor peak latency and topography distribution, TF8 and  
384 TF6 (peaking at 138 and 228 ms, respectively) were identified at fronto-central and  
385 centro-parietal sites of the scalp and associated with ERP components signaled in the  
386 grand averages as P1 and P2 (see Fig. 3). Furthermore, TF7 (peaking at 176 ms),  
387 maximal at frontal scalp sites, was related to N2 (Figs 3 and 4).

388

389 **Fig. 4. Temporal factors extracted through the application of the tPCA.**

390



391 Subsequently, the sPCA extracted three spatial factors for each temporal factor,  
392 except for TF5 and TF6, where only two spatial factors were extracted. Therefore, the  
393 temporospatial PCA yielded a total of 22 factor combinations. Repeated-measures  
394 ANOVAs on each temporospatial factor were carried out for exploring exogenous  
395 attention (i.e., P1, P2, N2 at different scalp areas) triggered by emotional distractors  
396 (three levels: F, D, and N) with respect to the HRV group (two levels: high and low).

397 Table 3 also provides the statistical details of these analyses including main  
398 effects of emotional distractor and the interaction effects between emotional distractor  
399 by HRV group. As can be appreciated in this table, a clear effect related to the  
400 emotional content conveyed by distractor pictures was revealed for both P1 and P2  
401 components. Specifically, posterior scalp regions of P1 (corresponding to SF1 and SF2)  
402 showed a significant main effect of emotional distractor [SF1:  $F(1.97,55.26) = 5.729$ ,  $p$   
403  $= .006$ ;  $\eta^2 = 0.170$ ; SF2:  $F(1.95,54.65) = 3.429$ ,  $p = .041$ ;  $\eta^2 = 0.109$ ], with higher  
404 amplitudes for trials including fearful distractors than neutral ones ( $p < .05$ ). The main  
405 effect of emotional distractor also reached significant results for P2 [SF2:  
406  $F(1.99,55.696) = 3.710$ ,  $p = .031$ ;  $\eta^2 = 0.117$ ], showing a complementary pattern in  
407 which brain amplitudes at frontal regions were higher for disgusting compared to  
408 neutral distractors ( $p = .050$ ). However, no interaction effects involving HRV were  
409 found for these ERP components.

410

411 **Table 3. Description and statistical results for the temporal factors sensitive to**  
412 **experimental manipulations extracted by temporospatial Principal Component**  
413 **Analysis. Post-hoc results are shared by all spatial factor belonging to each**  
414 **temporal factor.**

| Temporal factor | Peak (ms) | Spatial factor: scalp distribution | ANOVAs (Distractor type, d.f.=2, 56) | ANOVAs (Distractor type x HRV group, d.f.=2, 56) | Post-hoc tests                   |
|-----------------|-----------|------------------------------------|--------------------------------------|--------------------------------------------------|----------------------------------|
| FT8 (P1)        | 138       | SF1 Parietooccipital               | <b>F=5.729, p=0.006</b>              | F=0.812, p=0.4                                   | F > N                            |
|                 |           | SF2 Temporoparietal                | <b>F=3.429, p=0.041</b>              | F=0.129, p=0.9                                   |                                  |
|                 |           | SF3 Centroparietal                 | F=2.170, p=0.124                     | F=0.084, p=0.9                                   |                                  |
| TF7 (N2)        | 176       | SF1 Frontal                        | F=0.478, p=0.6                       | <b>F=5.461, p=0.007</b>                          | <b>High HRV: D &gt; F</b>        |
|                 |           | SF2 Frontocentral                  | F=1.022, p=0.4                       | <b>F=4.225, p=0.021</b>                          | <b>High HRV D &gt; Low HRV D</b> |
|                 |           | SF3 Centroparietal                 | F=0.139, p=0.8                       | <b>F=6.125, p=0.005</b>                          | <b>High HRV N &gt; Low HRV N</b> |
| FT6 (P2)        | 228       | SF1 Posterior                      | F=1.483, p=0.2                       | F=1.134, p=0.3                                   |                                  |
|                 |           | SF2 Frontal                        | <b>F=3.710, p=0.031</b>              | F=1.204, p=0.3                                   | <b>D &gt; N</b>                  |

415 TF: temporal factor; SF: spatial factor; d.f.: degrees of freedom; High HRV: High Heart Rate Variability  
 416 Group; Low HRV: Low Heart Rate Variability Group; F: Fearful; D: Disgust; N: Neutral

417

418 Finally, with respect to N2, different scalp regions reached statistical  
 419 significance for the interaction between emotional distractor by HRV group [SF1:  
 420  $F(1.97,55.18) = 5.462, p = .007; \eta^2 = 0.163$ ; SF2:  $F(1.9,53.27) = 4.225, p = .021; \eta^2 =$   
 421  $0.131$ ; SF3:  $F(1.89,52.90) = 6.125, p = .005; \eta^2 = 0.179$ ]. Post hoc tests showed  
 422 enhanced N2 amplitudes for disgusting compared to fearful emotional distractors. This  
 423 pattern was only exhibited for the high HRV group ( $p < 0.01$ ; see Figs. 5a and 5b).  
 424 Although the N2 amplitude was different between fearful compared to neutral  
 425 distractors, it did not reveal significant differences for any scalp regions ( $p = 1$ ).  
 426 Furthermore, high HRV subjects exhibited frontal N2 augmented amplitudes for both  
 427 disgust and neutral distractors compared to low HRV group ( $p < 0.05$ ). No other  
 428 significant data were found on the rest of the ERP components with respect to this  
 429 interaction effect. Finally, a main effect of HRV group ( $F(1,28) = 4.294, p = .048, \eta^2 =$   
 430  $.133$ ) was found for N2, which presented a higher amplitude in high HRV than low

431 HRV individuals. Mainly both frontal and central regions were sensitive to this  
432 comparison.

433

434 **Fig. 5. ERP amplitudes to the three emotional distractors in high (a) and low (b)**  
435 **HRV groups at FPz.**

436

## 437 **Source estimation results on N2**

438 In order to three-dimensionally estimate cortical regions that could account for the  
439 experimental effects observed in N2 regarding the interaction between emotional  
440 distractor by HRV group, a final analytical step was computed. To achieve this, N2 TF  
441 scores of each subject, electrode, and condition were submitted to eLORETA. Then, the  
442 voxel-based whole-brain eLORETA-images (6329 voxels) were compared among the  
443 three emotional distractor conditions for the whole sample of participants. To this aim,  
444 statistical non-parametric randomization tests were performed. According to the  
445 computed comparisons related to N2 activation, disgusting distractors were associated  
446 with enhanced activity in several voxels within BA13 (insula; MNI coordinates:  $x = 35$ ,  
447  $y = 5$ ,  $z = 15$ ) for high HRV compared to low HRV subjects in response to disgusting  
448 distractors (see Fig. 6). Activation differences among the remainder of the distractor  
449 conditions did not reach significance. No other ROIs were sensitive regarding this  
450 interaction between emotional distractor by HRV group.

451

452 **Fig. 6. Insula activation to disgusting distractors (low vs. high HRV). Average**  
453 **current densities for each condition are also shown.** (D, disgusting distractors; F,  
454 fear-evoking distractors; N, neutral distractors). Error bars represent standard errors.

455

456

## 457 **Discussion**

458 The current study points out that to understand the differential effect of fearful and  
459 disgusting stimulation on exogenous attention it is important to consider the time course  
460 of its different subprocesses. Fear seems to be processed at a very early stage such as  
461 100 ms after stimulus onset, producing a rapid response in the whole sample of  
462 participants. Disgust would also capture exogenous attention at a very early phase,  
463 although later than fear. In fact, disgusting distractors attracted exogenous attention  
464 resources more efficiently than fear at 200 ms after stimulus onset, as reflected by its  
465 effects on the N2 and P2 components of the ERPs. Interestingly, the augmented N2  
466 response to disgust distractors was only present in those participants having a high HRV  
467 level.

468         These apparently puzzling results can well be understood from an evolutionary  
469 perspective, which is in agreement with previous proposals describing that exogenous  
470 attentional involves different functional phases or processes (see a review in [12]). Prior  
471 studies have distinguished different ERP components (peak latency from 100 to 250  
472 ms) in response to visual stimulation reflecting the temporal dynamics of exogenous  
473 attention towards emotional events (e.g., [2, 5]). Early functional phases or processes of  
474 exogenous attention would be related to a greater mobilization of processing resources  
475 toward negatively valenced stimuli indicating probably a negativity bias, which would  
476 have adaptive and evolutionary advantages for survival (see reviews, [12, 53]). This  
477 effect would confirm the biological importance of emotional stimuli compared to  
478 neutral [4, 6, 54-55]. On the contrary, during later phases, attentional resources would  
479 be directed preferentially to positive and neutral events that do not require such an  
480 urgent response as negative stimuli do [55]. However, a direct comparison between

481 present data and this previous evidence cannot be made for different reasons: 1)  
482 experimental paradigms were different; 2) we did not include positive stimuli; 3) in  
483 previous investigations negative pictures used depicted only fear-related but not disgust-  
484 related content. Even though, our results are not exclusive with those reported by other  
485 studies, but rather are complementary.

486         According to the statistical results, fearful distractors elicited the largest  
487 posterior P1 amplitudes. It has been indicated that fear eliciting stimulation signals an  
488 imminent threat that calls for an immediate and fast response while disgust stimuli do  
489 not. In support of this idea, previous studies on exogenous attention have reported  
490 enhanced parieto-occipital P1 amplitudes to fear evoking stimuli used as distractors [3,  
491 56-57]. In the same line, attentional effects to disgust stimuli have not been reflected in  
492 P1 amplitude, which has been interpreted as its effects occur later [58]. Different  
493 findings converge to propose that higher P1 amplitudes would reflect amplification of  
494 sensory processing (as a subprocess belonging to exogenous attention) to fear  
495 stimulation gaining access for awareness and processing it to a deeper extent [5]. This  
496 enhancement of attentional resources to fearful events would involve a clear adaptative  
497 advantage in biological terms, playing a crucial role for survival [1]. In this sense,  
498 sensory visual cortices would increase their neural activity mediated by top-down  
499 attention mechanisms where both the amygdala and ventral prefrontal regions would  
500 generate rapid saliency signals for fear stimulation [59-61].

501         On the other hand, ERP components peaking around 200 ms showed an increase  
502 of attention resources for processing disgusting distractors. Specifically, P2 component  
503 was characterized by two spatial components (frontal and posterior) through spatial  
504 principal component analyses. Although the posterior P2 wave showed no modulations  
505 regarding exogenous attention, disgust distractors elicited larger anterior P2 amplitudes

506 than neutral distractors. Furthermore, disgust distractors produced larger N2 amplitudes  
507 than fearful stimuli, but this modulation was only true for the high HRV group. Several  
508 investigations have found similar modulations in P2 showing greater sensitivity toward  
509 negative events, considering this component as a neural index of exogenous attention  
510 [55, 62-63]. Prior studies have highlighted that disgust is a kind of event capable of  
511 attracting automatic attention resources even more efficiently than fear [14]. Although  
512 this effect was also found around 200 ms after stimulus onset, N2 modulations was not  
513 previously reported and possible influences of HRV on neural responses linked to  
514 exogenous attention has not been described yet.

515         The selective enhancement of exogenous attention to negatively valenced  
516 distractors (i.e, fearful and disgusting) deserves further consideration. When the  
517 organism is involved in the performance of a given task and a potentially threatening  
518 distractor appears, the most adaptive response is to do a quick evaluation to explore  
519 whether such new stimulus seems to be dangerous in order to initiate a fight or flight  
520 response [1]. However, in the case that the outcome of such initial evaluation does not  
521 indicate an imminent danger, but the stimulus includes ambiguous information, as  
522 happens with disgusting stimuli that can bring death (e.g., illness) or life (e.g., edible  
523 food), the most adaptive response would be mobilize attentional resources to analyze it  
524 more deeply. Our findings suggest that this attentional adaptive response is evident for  
525 high HRV participants as shown by both enhanced N2 amplitudes and faster RTs to  
526 disgusting distractors compared to fearful ones. Also disgusting provoked higher error  
527 rates than neutral distractors. N2 family deflections have been described as emotion-  
528 sensitive ERP waves showing enhanced allocation of exogenous attention resources  
529 toward negative stimulation compared to neutral ones [62, 64]. In a previous study, we  
530 also found that disgusting distractors capture attention more efficiently than fearful

531 distractors [14] as reflected by neural responses peaking around 200 ms after stimulus  
532 onset. Other studies have offered evidence indirectly supporting the suggestion that  
533 disgusting distractors capture exogenous attention with latency responses around 200  
534 ms. Van Hooff et al [11] manipulated the temporal interval between cue onset (disgust,  
535 fear, or neutral picture) and target showing that targets presented 200 ms after disgust  
536 cue onset were identified less accurately and more slowly than targets presented after  
537 fear or neutral cues, indicating a more efficient capture of attention by disgust than by  
538 fear cues. Similarly, other studies focused on the study on automatic attention to  
539 negative stimulation (disgust and fear), have described longer RTs to targets that  
540 appeared 200 ms after the disgusting pictures [65]. Although ERPs were not recorded  
541 and the methodology used in their study does not allow exploration of the time course  
542 of the differential responses to fear and disgust, it has been suggested that attentional  
543 response for fearful pictures seems to occur earlier and more automatically than for  
544 disgusting events, since just the quick registration of their rough content is enough to  
545 trigger the appropriate fight or flight reaction [65].

546         The influence of HRV on the very early phases of the exogenous attentional  
547 processing (i.e., P1 and P2 ERP deflections) was not observed. However, an interesting  
548 effect was evident in a later phase, as reflected by the augmentation of N2 amplitudes to  
549 disgust distractors, only for the high HRV group. Our results also indicated that this  
550 enhancement of N2 seem to be related to neural activity within the insula. These effect  
551 involving participants characterized by a high level of HRV was also prominent at the  
552 behavioral level. RTs for trials including disgust distractors were longer compared to  
553 neutral and fear ones. No effect of HRV was detected in the error rates.

554         This pattern of results regarding the role of HRV can also be interpreted from an  
555 evolutionary perspective. Following present results, the HRV may play an important

556 role in a late stage of attentional processing, where individuals (i.e., high HRV group)  
557 become involved into a more detailed exploration of disgusting stimuli, as reflected by  
558 RTs and N2. However, low HRV participants did not show the same attentional pattern.  
559 They seem not to be able to disengage their initial attentional response to fear distractors  
560 as manifested by their short RT responses, which is typical of hypervigilance responses  
561 [34]. Similar results have previously been reported by our group. A deeper cardiac  
562 deceleration was found to disgusting distractors compared to fear and neutral ones in an  
563 exogenous attention task only in high HRV participants. The low HRV group showed  
564 no differences in cardiac deceleration to the three types of emotional distractors [23].  
565 However, early attentional responses to threat are required to face with this kind of  
566 stimulation for survival. In this case, higher neural responses were detected in P1 when  
567 fearful distractors appeared across all participants, regardless of their HRV level.

568         As it mentioned, neural activity within the insula was related to the enhanced N2  
569 during disgust distractor trials for high HRV individuals. The insula has been associated  
570 with the processing of negative emotional stimuli [12, 66-67], especially with the  
571 emotion of disgust [13] as well as with interoception and bodily signals' processing [68-  
572 69]. Importantly, recently the insula has also been suggested as a key structure in two  
573 relevant models for the interpretation of our findings. On one side, Carretié [12]  
574 included the insula as one of the three main brain areas (together with the amygdala and  
575 ventral prefrontal cortex) responsible for the first phase of exogenous attention, called  
576 "preattention". During this phase, a fast evaluation of the environment based on low-  
577 level stimulus features is conducted in order to detect relevant stimulation and to trigger  
578 reorienting processes. Also, Shafer et al [70] included the insula between those brain  
579 areas that reflect automaticity in the emotional processing. On the other side, the  
580 relationship between HRV and cerebral blood flow responses elicited by different kind



581 of emotional states such as happiness, sadness, disgust neutral has been previously  
582 explored [24]. Their results showed an association between HRV and activity in the  
583 insula, but the specific role of each specific emotion on this heart and brain link was not  
584 explored. Smith et al [71] presented a version of the Neurovisceral Integration Model in  
585 which the nervous system structures that contribute to vagal control are organized in an  
586 eight-level hierarchy, increasing the range and complexity of function at each level. The  
587 insula plays a primary role at level six, where the structures implicated in the vagal  
588 regulation based on perceptual representation of one's current somatic/visceral state are  
589 included. Taking into consideration the role of the insula indicated by these authors  
590 from different perspectives, it could be suggested that this structure may be contributing  
591 to the preattention phase by offering important information about the current bodily  
592 state that may help to regulate vagal control as well as the attentional responses.

593 Vagally mediated HRV has been structurally and functionally linked to  
594 emotional regulation. It has been argued that prefrontal, anterior cingulate, and insula  
595 cortices constitutes a neural network with bidirectional communication with the  
596 amygdala and other structures implicated in emotional regulation as well as autonomic  
597 regulation of the heart [25]. In this way, HRV becomes an index of emotion, cognition,  
598 and health related physiological processes. Regarding emotional regulation, it has been  
599 found that high HRV is associated with context appropriate emotional responses, for  
600 example, under a startle emotional modulation paradigm [22] or to phasic HR responses  
601 in addition to behavioral and self-reported emotional responses [23, 39, 72-73]. Low  
602 HRV, however, has previously been related to poor emotional regulation,  
603 hypervigilance, and exaggerated responses to innocuous stimuli [21-22, 31]. This  
604 maladaptive pattern of responses is consistent with faster RTs shown to trials containing  
605 fearful distractors and the absence of a P2 response related to disgusting stimuli in the

606 present study in the low HRV participants. Although resting HRV can be understood as  
607 a trait like measure, it is not included in the characteristics that have been repeatedly  
608 associated with negativity bias to negative stimuli. However, the findings of the present  
609 study suggest that HRV may be a more informative index of underlying processes of  
610 exogenous attention to emotional stimuli than trait anxiety or disgust sensitivity (see S1  
611 **Supporting Information**), which posits as a potential tool that may help to understand  
612 and disentangle inconsistencies in the previous literature.

613         Although exposed findings offer relevant evidence on the brain dynamics related  
614 to attentional capture by discrete emotions, some potential limitations need to be  
615 addressed. In this sense, valence and arousal scores were significantly more negative  
616 and arousing for fearful than disgusting distractors. Such differences in these  
617 dimensional affective characteristics between emotional stimuli (distinct from their  
618 fearfulness and disgustingness, respectively) might have some unexpected influence on  
619 attentional capture processes leading to misunderstandings. Nevertheless, although  
620 discrete emotions (as a part of affective experience) could be represented in a  
621 dimensional space [74], they have their own and intrinsic emotional meaning that makes  
622 them unique, apart from the other features. In the current context, future studies  
623 combining both discrete and dimensional approaches for representing emotional states  
624 are needed to extend knowledge on the capability of emotional stimuli for attracting  
625 automatic attention resources. On the other hand, the relatively small sample size used  
626 in the present experiment could affect statistical power. To check if our results had the  
627 necessary and significant statistical power, we carried out a series of post-hoc power  
628 analysis (see S2 **Supporting Information**). These analyses yielded a high statistical  
629 power for the interaction effect between the type of Distractor x HRV group for each of

630 ERP component sensitive to the experimental manipulations related to attentional  
631 capture.

632 In sum, findings derived from the present investigation provide new data about  
633 how exogenous attention is captured by different types of negatively valence stimuli. A  
634 different time course for fear and disgust is shown by electrophysiological indices. Fear  
635 distractors capture automatic attention at very early processing phases (i.e., greatest P1  
636 amplitudes) followed by an augmented modulation in the P2 component in response to  
637 disgust events. Data suggest that HRV might contribute to modulate the allocation of  
638 exogenous attentional resources for disgusting stimulation as reflected in the N2  
639 amplitudes. Enhanced activation within the insula lead to think that this region may  
640 have a relevant role in the early stages of exogenous attention. Future research should  
641 be done to better characterize the temporal course of exogenous attention to emotional  
642 stimuli, taking into account measures of HRV as a variable that might be important  
643 when attention is automatically triggered by potential threats.

644

## 645 **Acknowledgements**

646 The authors would like to thank all participants for taking part in the experiment.

647

648

## 649 **References**

- 650 1. Öhman A, Mineka S. Fears, phobias, and preparedness: toward an evolved module of  
651 fear and fear learning. *Psychol Rev.* 2001; 108(3): 483–522.
- 652 2. Carretié L, Hinojosa JA, Martín-Loeches M, Mercado F, Tapia M. Automatic  
653 attention to emotional stimuli: neural correlates. *Hum Brain Mapp.* 2004; 22(4):  
654 290–299.

- 655 3. Carretié L, Hinojosa JA, López-Martín S, Albert J, Tapia M, Pozo MA. Danger is  
656 worse when it moves: neural and behavioral indices of enhanced attentional  
657 capture by dynamic threatening stimuli. *Neuropsychologia*. 2009; 47(2): 364–  
658 369.
- 659 4. Doallo S, Holguin SR, Cadaveira F. Attentional load affects automatic emotional  
660 processing: evidence from event-related potentials. *Neuroreport*. 2006; 17:  
661 1797–1801.
- 662 5. Pourtois G, Schettino A, Vuilleumier P. Brain mechanisms for emotional influences  
663 on perception and attention: what is magic and what is not. *Biol Psychol*. 2012;  
664 92: 492–512.
- 665 6. Vuilleumier P, Armony JL, Driver J, Dolan RJ. Effects of attention and emotion on  
666 face processing in the human brain: an event-related fMRI study. *Neuron*. 2001;  
667 30: 829–841.
- 668 7. Yuan J, Zhang Q, Chen A, Li H, Wang Q, Zhuang Z, et al. Are we sensitive to  
669 valence differences in emotionally negative stimuli? Electrophysiological  
670 evidence from an ERP study. *Neuropsychologia*. 2007; 45: 2764-71.
- 671 8. Alpers, G. and Pauli, P. Emotional pictures predominate in binocular rivalry. *Cogn*  
672 *Emot*. 2006; 20: 596–607.
- 673 9. Constantine R, McNally RJ, Hornig CD. Snake fear and the pictorial emotional  
674 Stroop paradigm. *Cognit Ther Res*. 2001; 25: 757–764.
- 675 10. Thomas SJ, Johnstone SJ, Gonsalvez CJ. Event-related potentials during an  
676 emotional Stroop task. *Int J Psychophysiol*. 2007; 63: 221–231.
- 677 11. van Hooff JC, Devue C, Vieweg PE, Theeuwes J. Disgust-and not fear-evoking  
678 images hold our attention. *Acta Psychol*. 2013; 143(1): 1–6.

- 679 12. Carretié L. Exogenous (automatic) attention to emotional stimuli: a review. *Cogn*  
680 *Affect Behav Neurosci.* 2014; 14(4): 1228–1258.
- 681 13. Calder AJ, Lawrence AD, Young AW. Neuropsychology of fear and loathing. *Nat*  
682 *Rev Neurosci.* 2001; 2(5): 352–363.
- 683 14. Carretié L, Ruiz-Padial E, López-Martín S, Albert J. Decomposing unpleasantness:  
684 differential exogenous attention to disgusting and fearful stimuli. *Biol*  
685 *Psychol.* 2011; 86(3): 247–253.
- 686 15. Pezzulo G, Iodice P, Barca L, Chausse P, Monceau S, Mermillod M. Increased heart  
687 rate after exercise facilitates the processing of fearful but not disgusted faces. *Sci*  
688 *Rep.* 2018; 8(1): 1-10.
- 689 16. Zhang D, Liu Y, Wang L, Ai H, Luo Y. Mechanisms for attentional modulation by  
690 threatening emotions of fear, anger, and disgust. *Cogn Affect Behav*  
691 *Neurosci.* 2017; 17(1): 198–210.
- 692 17. Cisler JM, Olatunji BO, Lohr JM. Disgust, fear, and the anxiety disorders: A critical  
693 review. *Clin Psychol Rev.* 2009; 29(1), 34-46.
- 694 18. DePesa NS, Cassisi JE. Affective and autonomic responses to erotic images:  
695 evidence of disgust-based mechanisms in Female Sexual Interest/Arousal  
696 Disorder. *J Sex Res.* 2017; 54(7), 877-886.
- 697 19. Gilchrist PT, Vranceanu T, Béland S, Bacon SL, Ditto B. Disgust stimuli reduce  
698 heart rate but do not contribute to vasovagal symptoms. *J Behav Ther Exp*  
699 *Psychiatry.* 2016; 51: 116-122.
- 700 20. Serrano MÁ, Rosell-Clari V, García-Soriano G. The Role of Perceived Control in  
701 the Psychophysiological Responses to Disgust of Subclinical OCD Women.  
702 *Sensors.* 2019; 19(19), 4180.

- 703 21. Ruiz-Padial E, Thayer JF. Resting heart rate variability and the startle reflex to  
704 briefly presented affective pictures. *Int J Psychophysiol.* 2014; 94: 329–335.
- 705 22. Ruiz-Padial E, Sollers JJIII, Vila J, Thayer JF. The rhythm of the heart in the blink  
706 of an eye: emotion-modulated startle magnitude covaries with heart rate  
707 variability. *Psychophysiology.* 2003; 40: 306–313.
- 708 23. Ruiz-Padial E, Mendoza Medialdea MT, Reyes del Paso GA, Thayer JF. Individual  
709 differences in attentional capture by pictures of fear and disgust as indexed by  
710 cardiac responses. *J Psychophysiol.* 2018; 32 (4): 191-201.
- 711 24. Lane RD, McRae K, Reiman EM, Chen K, Ahern GL, Thayer JF. Neural correlates  
712 of heart rate variability during emotion. *Neuroimage.* 2009; 4(1): 213–222.
- 713 25. Thayer JF, Lane RD. Claude Bernard and the heart–brain connection: further  
714 elaboration of a model of neurovisceral integration. *Neurosci Biobehav Rev.*  
715 2009; 33: 81–88.
- 716 26. Thayer JF, Hansen AL, Saus-Rose E, Johnsen BH. Heart rate variability, prefrontal  
717 neural function, and cognitive performance: the neurovisceral integration  
718 perspective on self-regulation, adaptation, and health. *Ann Behav Med.* 2009;  
719 37: 141–153.
- 720 27. Smith R, Allen JJ, Thayer JF, Lane RD. Altered functional connectivity between  
721 medial prefrontal cortex and the inferior brainstem in major depression during  
722 appraisal of subjective emotional responses: a preliminary study. *Biol*  
723 *Psychol.* 2015; 108: 13–24.
- 724 28. Sakaki M, Yoo HJ, Nga L, Lee TH, Thayer JF, Mather M. Heart rate variability is  
725 associated with amygdala functional connectivity with MPFC across younger  
726 and older adults. *Neuroimage.* 2016; 39: 44–52.

- 727 29. Thayer JF, Friedman BH, Borkovec TD, Johnsen BH, Molina S. Phasic heart period  
728 reactions to cued threat and nonthreat stimuli in generalized anxiety  
729 disorder. *Psychophysiology*. 2000; 37(3): 361–368.
- 730 30. Ruiz-Padial E, Vila J, Thayer JF. The effect of conscious and non-conscious  
731 presentation of biologically relevant emotion pictures on emotion modulated  
732 startle and phasic heart rate. *Int J Psychophysiol*. 2011; 79: 341–346.
- 733 31. Friedman BH. An autonomic flexibility-neurovisceral integration model of anxiety  
734 and cardiac vagal tone. *Biol Psychol*. 2007; 74: 185–199.
- 735 32. Wendt J, Neubert J, Koenig J, Thayer JF Hamm AO. Resting heart rate variability is  
736 associated with inhibition of conditioned fear. *Psychophysiology*. 2015; 52(9):  
737 1161–1166.
- 738 33. Park G, Vasey MW, Van Bavel JJ, Thayer JF. Cardiac vagal tone is correlated with  
739 selective attention to neutral distractors under load. *Psychophysiology*. 2013a;  
740 50(4): 398–406.
- 741 34. Park G, Van Bavel JJ, Vasey MW, Thayer JF. Cardiac vagal tone predicts  
742 attentional engagement to and disengagement from fearful  
743 faces. *Emotion*. 2013b; 13(4): 645.
- 744 35. Lang PJ, Bradley MM, Cuthbert BN. International affective picture system (IAPS):  
745 affective ratings of pictures and instruction manual. Technical Report A-8.  
746 Gainesville, FL: University of Florida; 2008.
- 747 36. Carretié L, Tapia M, López-Martín S, Albert J. EmoMadrid: An emotional pictures  
748 database for affect research. *Motiv Emot*. 2019; 43(6): 929-939.
- 749 37. Task Force of the European Society of Cardiology and the North American Society  
750 of Pacing and Electrophysiology. Heart rate variability: standards of

- 751 measurement, physiology interpretation, and clinical use. *Circulation*. 1996; 93:  
752 1043–1065.
- 753 38. Laborde S, Mosley E, Thayer JF. Heart rate variability and cardiac vagal tone in  
754 psychophysiological research—recommendations for experiment planning, data  
755 analysis, and data reporting. *Front Psychol*. 2017; 8: 213.
- 756 39. Melzig C, Weike A, Hamm A, Thayer J. Individual differences in fear-potentiated  
757 startle as a function of resting heart rate variability: implications for panic  
758 disorder. *Int J Psychophysiol*. 2009; 71: 109–117.
- 759 40. Dien J, Frishkoff G. Principal components analysis of event-related potential  
760 datasets. In: Handy T, editor. *Event-Related Potentials: A Methods Handbook*.  
761 Cambridge: MIT Press; 2005. pp. 189–208.
- 762 41. Chapman RM, McCrary JW. EP component identification and measurement by  
763 principal components analysis. *Brain Cogn*. 1995; 27: 288–310.
- 764 42. Cattell RB. The scree test for the number of factors. *Multivar Behav Res*. 1966; 1:  
765 245–276.
- 766 43. Dien J. Evaluating two-step PCA of ERP data with geomin, infomax, oblimin,  
767 promax, and varimax rotations. *Psychophysiology*. 2010; 47: 170–183.
- 768 44. Pourtois G, Delplanque S, Michel C, Vuilleumier P. Beyond conventional event-  
769 related brain potential (ERP): exploring the time-course of visual emotion  
770 processing using topographic and principal component analyses. *Brain*  
771 *Topogr*. 2008; 20: 265–277.
- 772 45. Pascual-Marqui RD. Discrete, 3D Distributed, Linear Imaging Methods of Electric  
773 Neuronal Activity. Part 1: Exact, Zero Error Localization 2007; Available at:  
774 <http://arxiv.org/pdf/0710.3341> (accessed October 17, 2007).



- 775 46. Pascual-Marqui RD, Lehmann D, Koukkou M, Kochi K, Anderer P, Saletu B, et al.  
776 Assessing interactions in the brain with exact low-resolution electromagnetic  
777 tomography. *Philos Trans A Math Phys Eng Sci.* 2011; 369: 3768–3784.
- 778 47. Pascual-Marqui RD. Standardized low-resolution brain electromagnetic tomography  
779 (sLORETA): technical details. *Methods Find Exp Clin Pharmacol.* 2002; 24  
780 (Suppl. D): 5–12.
- 781 48. Dierks T, Jelic V, Pascual-Marqui RD, Wahlund L, Julin P, Linden DE, et al.  
782 Spatial pattern of cerebral glucose metabolism (PET) correlates with localization  
783 of intracerebral EEG-generators in Alzheimer’s disease. *Clin*  
784 *Neurophysiol.* 2000; 11: 1817–1824.
- 785 49. Mulert C, Jäger L, Schmitt R, Bussfeld P, Pogarell O, Möller HJ, et al. Integration  
786 of fMRI and simultaneous EEG: towards a comprehensive understanding of  
787 localization and time-course of brain activity in target detection. *Neuroimage.*  
788 2004; 22: 83–94.
- 789 50. Vitacco D, Brandeis D, Pascual-Marqui R, Martin E. Correspondence of event-  
790 related potential tomography and functional magnetic resonance imaging during  
791 language processing. *Hum Brain Mapp.* 2002; 17: 4–12
- 792 51. Dien J, Spencer KM, Donchin E. Localization of the event-related potential novelty  
793 response as defined by principal components analysis. *Cogn Brain Res.* 2003;  
794 17: 637–50.
- 795 52. Nichols TE, Holmes AP. Nonparametric permutation tests for functional  
796 neuroimaging: a primer with examples. *Hum Brain Mapp.* 2002;15(1): 1–25.
- 797 53. Emery NJ, Amaral DG. The role of the amygdala in primate social cognition.  
798 In: Lane RD, Nadel L, editors. *Cognitive Neuroscience of Emotion.* New York:  
799 Oxford University Press; 2000. p. 156–191.

- 800 54. Carretié L, Hinojosa JA, Mercado F, Tapia M. Cortical response to subjectively  
801 unconscious danger. *NeuroImage*. 2005; 24: 615–623.
- 802 55. Huang YX, Luo YJ. Temporal course of emotional negativity bias: an ERP  
803 study. *Neurosci Lett*. 2006; 398: 91–6.
- 804 56. Krusemark EA, Li W. Do all threats work the same way? Divergent effects of fear  
805 and disgust on sensory perception and attention. *J Neurosci*. 2011; 31(9): 3429–  
806 3434.
- 807 57. Pourtois G, Grandjean D, Sander D, Vuilleumier P. Electrophysiological correlates  
808 of rapid spatial orientating towards fearful faces. *Cereb Cortex* 2004; 14: 619–  
809 633.
- 810 58. Zimmer U, Keppel MT, Poglitsch C, Ischebeck A. ERP evidence for spatial  
811 attention being directed away from disgusting locations. *Psychophysiology*.  
812 2015; 52(10): 1317–1327.
- 813 59. Kawasaki H, Kaufman O, Damasio H, Damasio AR, Granner M, Bakken H, et al.  
814 Single-neuron responses to emotional visual stimuli in human ventral prefrontal  
815 cortex. *Nat Neurosci*. 2001; 4: 15–16.
- 816 60. Méndez-Bértolo C, Moratti S, Toledano R, Lopez-Sosa F, Martínez-Álvarez R, Mah  
817 Y, Vuilleumier P, Gil-Nagel A, Strange BA. A fast pathway for fear in human  
818 amygdala. *Nat Neurosci*. 2016; 19: 1041–1049.
- 819 61. Pourtois G, Spinelli L, Seeck M, Vuilleumier P. Temporal precedence of emotion  
820 over attention modulations in the lateral amygdala: intracranial evidence from a  
821 patient with temporal lobe epilepsy. *Cogn Affect Behav Neurosci*. 2010; 10: 83-  
822 93.

- 823 62. Carretié L, Kessel D, Carboni A, López-Martín S, Albert J, Tapia M, et al.  
824 Exogenous attention to facial vs. non-facial emotional visual stimuli. *Soc Cogn*  
825 *Affect Neurosci.* 2013; 8: 764–773.
- 826 63. Junhong H, Renlai Z, Senqi H. Effects on automatic attention due to exposure to  
827 pictures of emotional faces while performing Chinese word judgment tasks. *PloS*  
828 *One.* 2013; 8: e75386
- 829 64. Eimer M, Kiss M. Attentional capture by task-irrelevant fearful faces is revealed by  
830 the N2pc component. *Biol Psychol.* 2007; 74: 108–112.
- 831 65. van Hooff JC, van Buuringen M, El M'rabet I, de Gier M, van Zalingen L. Disgust-  
832 specific modulation of early attention processes. *Acta Psychol.* 2014; 152, 149–  
833 157.
- 834 66. Garfinkel SN, Critchley HD. Threat and the body: how the heart supports fear  
835 processing. *Trends in Cognitive Sciences* 2016; 20(1): 34–46.
- 836 67. Papagno C, Pisoni A, Mattavelli G, Casarotti A, Comi A, Fumagalli F, Bello L.  
837 Specific disgust processing in the left insula: new evidence from direct electrical  
838 stimulation. *Neuropsychologia.* 2016; 84: 29–35.
- 839 68. Craig AD. How do you feel now? The anterior insula and human awareness. *Nat*  
840 *Rev Neurosci.* 2009; 10: 59–70.
- 841 69. Meissner K, Wittmann M. Body signals, cardiac awareness, and the perception of  
842 time. *Biol Psychol.* 2011; 86: 289–297.
- 843 70. Shafer AT, Matveychuk D, Penney T, O'Hare AJ, Stokes J, Dolcos F. Processing of  
844 emotional distraction is both automatic and modulated by attention: evidence  
845 from an event-related fMRI investigation. *J Cogn Neurosci.* 2012; 24(5): 1233–  
846 1252.

- 847 71. Smith R, Thayer JF, Khalsa SS, Lane RD. The hierarchical basis of neurovisceral  
848 integration. *Neurosci Biobehav Rev.* 2017; 75: 274–296.
- 849 72. Thayer JF, Brosschot JF. Psychosomatics and psychopathology: looking up and  
850 down from the brain. *Psychoneuroendocrinology.* 2005; 30: 1050–1058.
- 851 73. Visted E, Sørensen L, Osnes B, Svendsen JL, Binder PE, Schanche E. The  
852 association between self-reported difficulties in emotion regulation and heart  
853 rate variability: the salient role of not accepting negative emotions. *Front*  
854 *Psychol.* 2017; 8: 328.
- 855 74. Adolphs R. How should neuroscience study emotions? By distinguishing emotion  
856 states, concepts, and experiences. *Soc Cog Affect Neurosci.* 2017; 12 (1): 24-31.

bioRxiv preprint doi: <https://doi.org/10.1101/2020.11.17.386334>; this version posted November 17, 2020. The copyright holder for this preprint (which was not certified by peer review) is the author/funder, who has granted bioRxiv a license to display the preprint in perpetuity. It is made available under aCC-BY 4.0 International license.

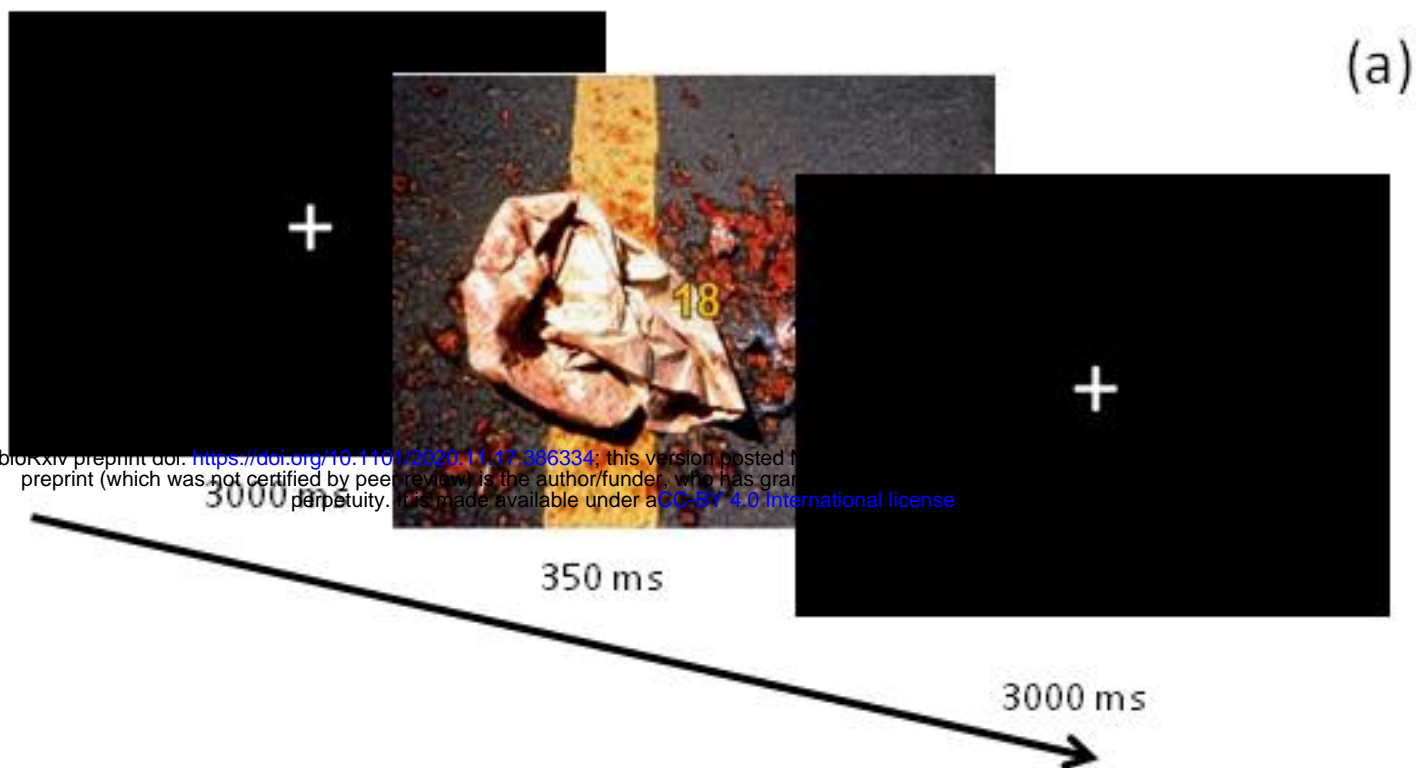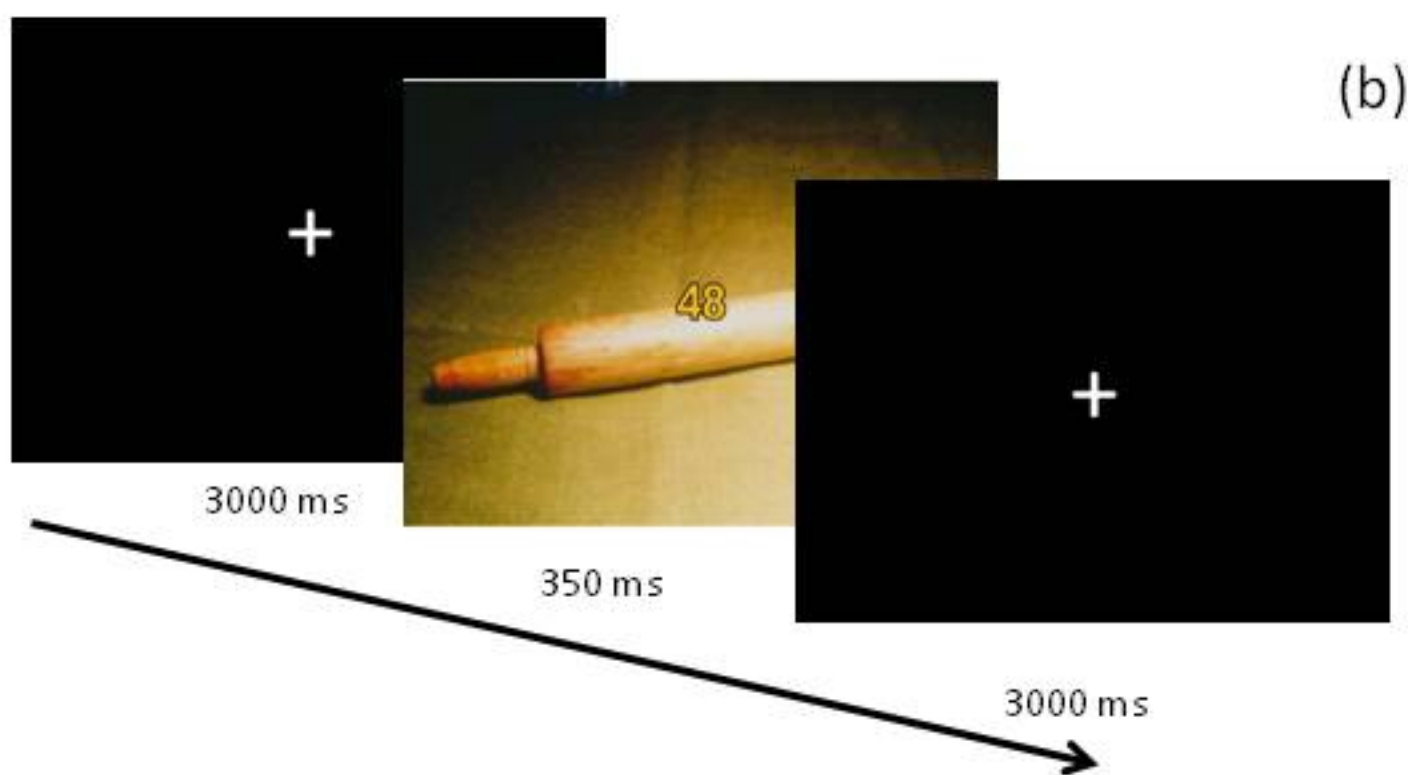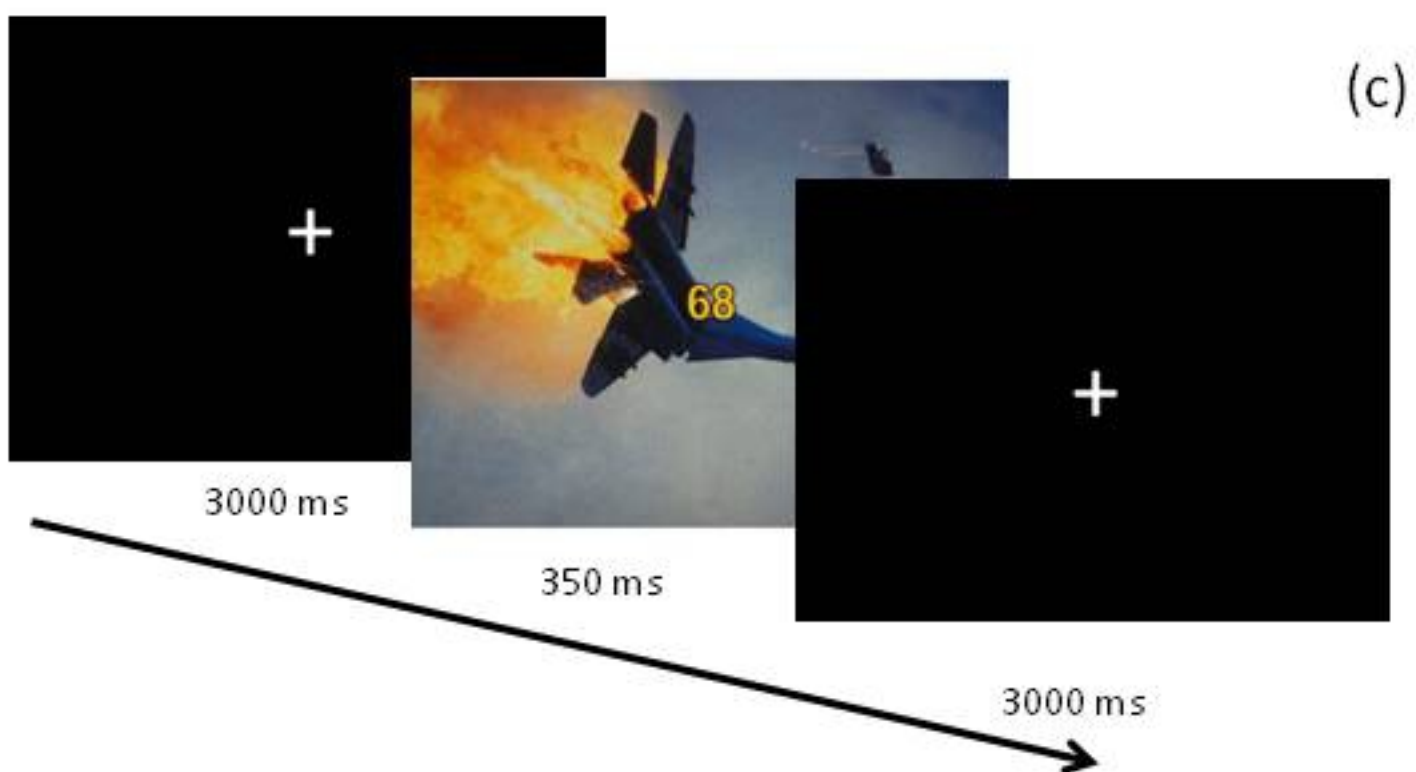

Figure 1

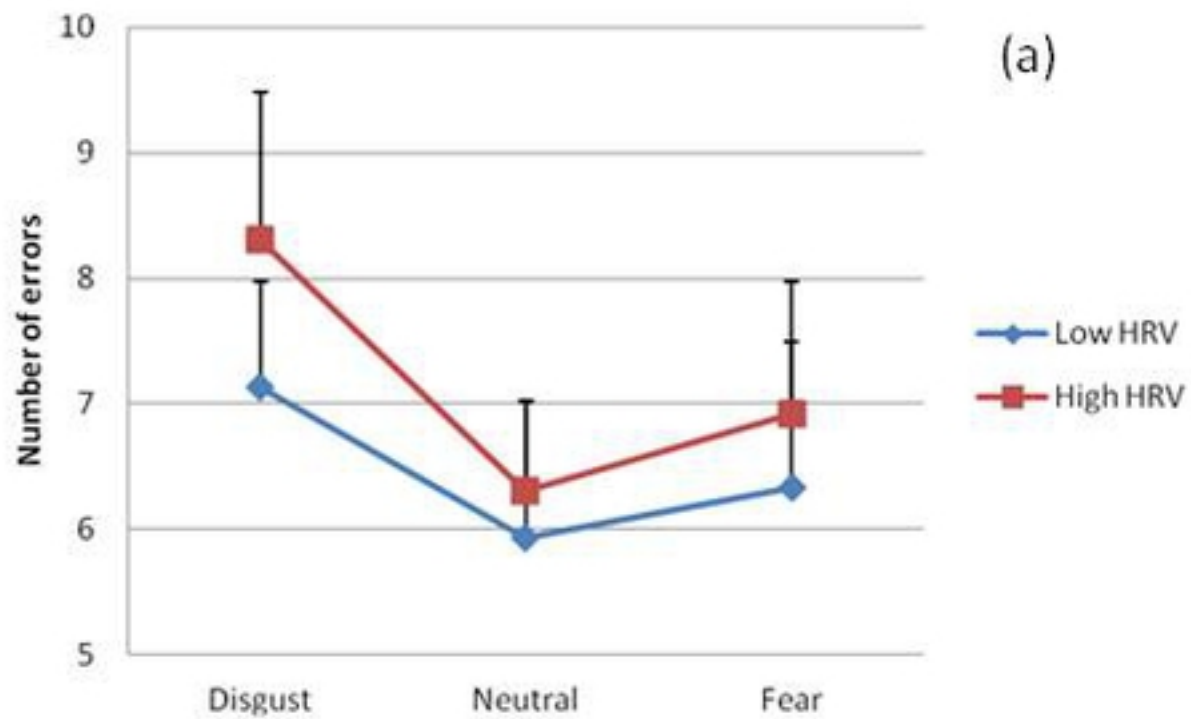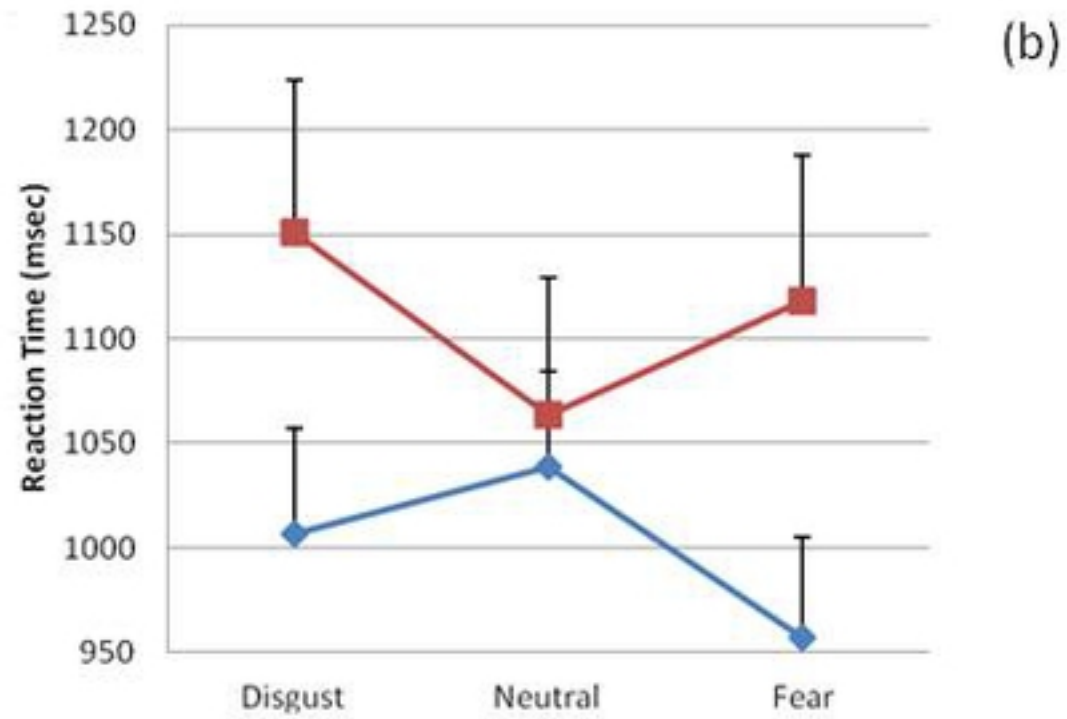

Figure 2

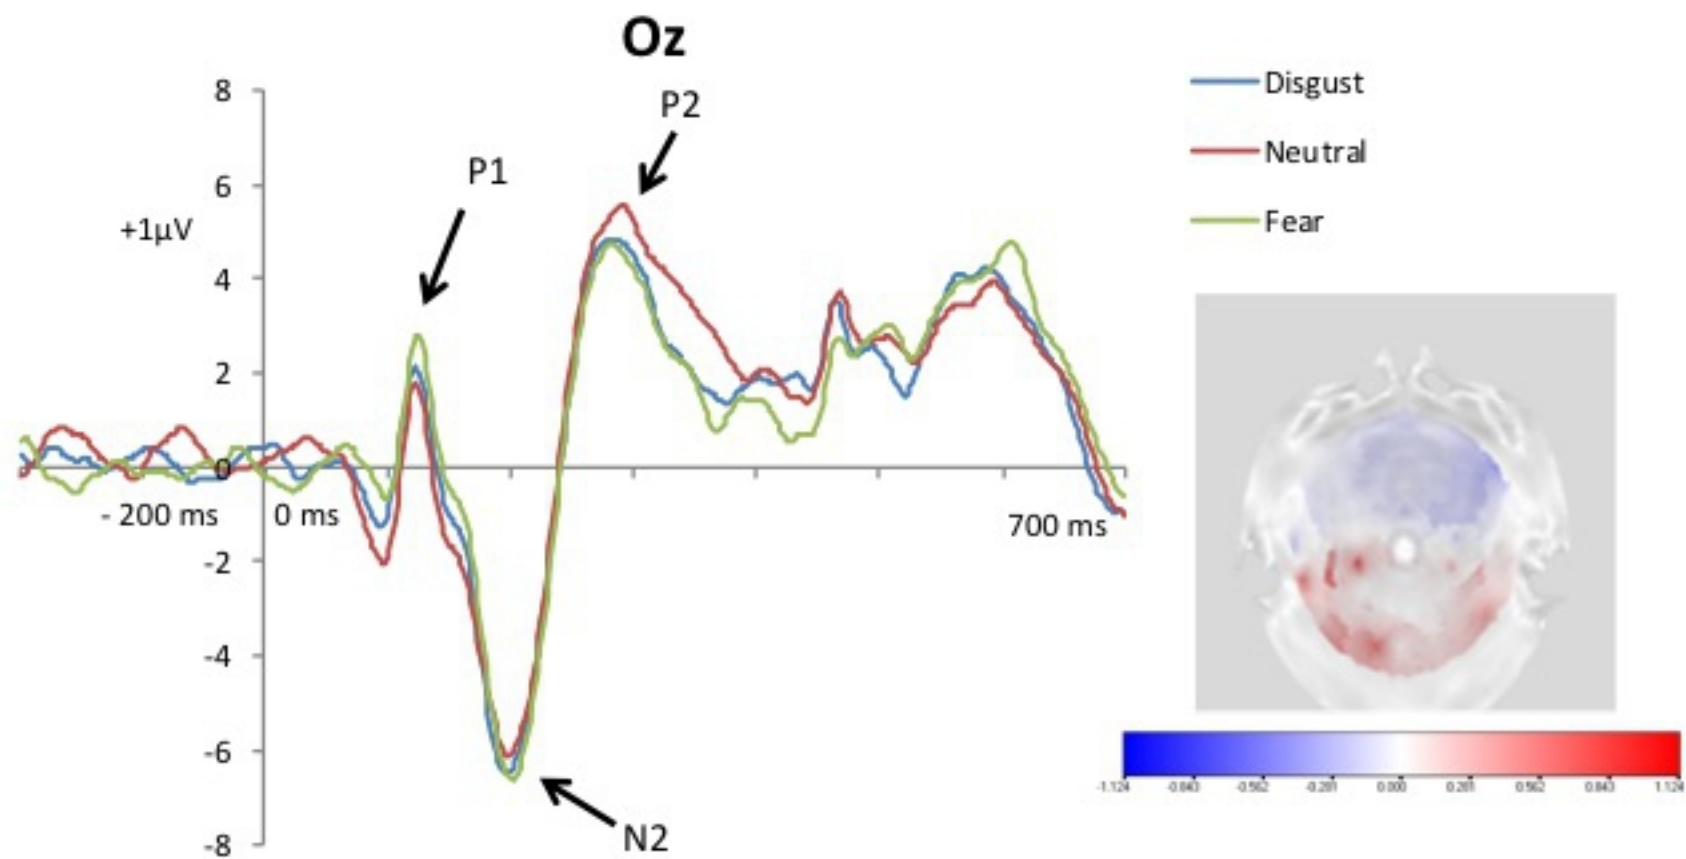

Figure 3

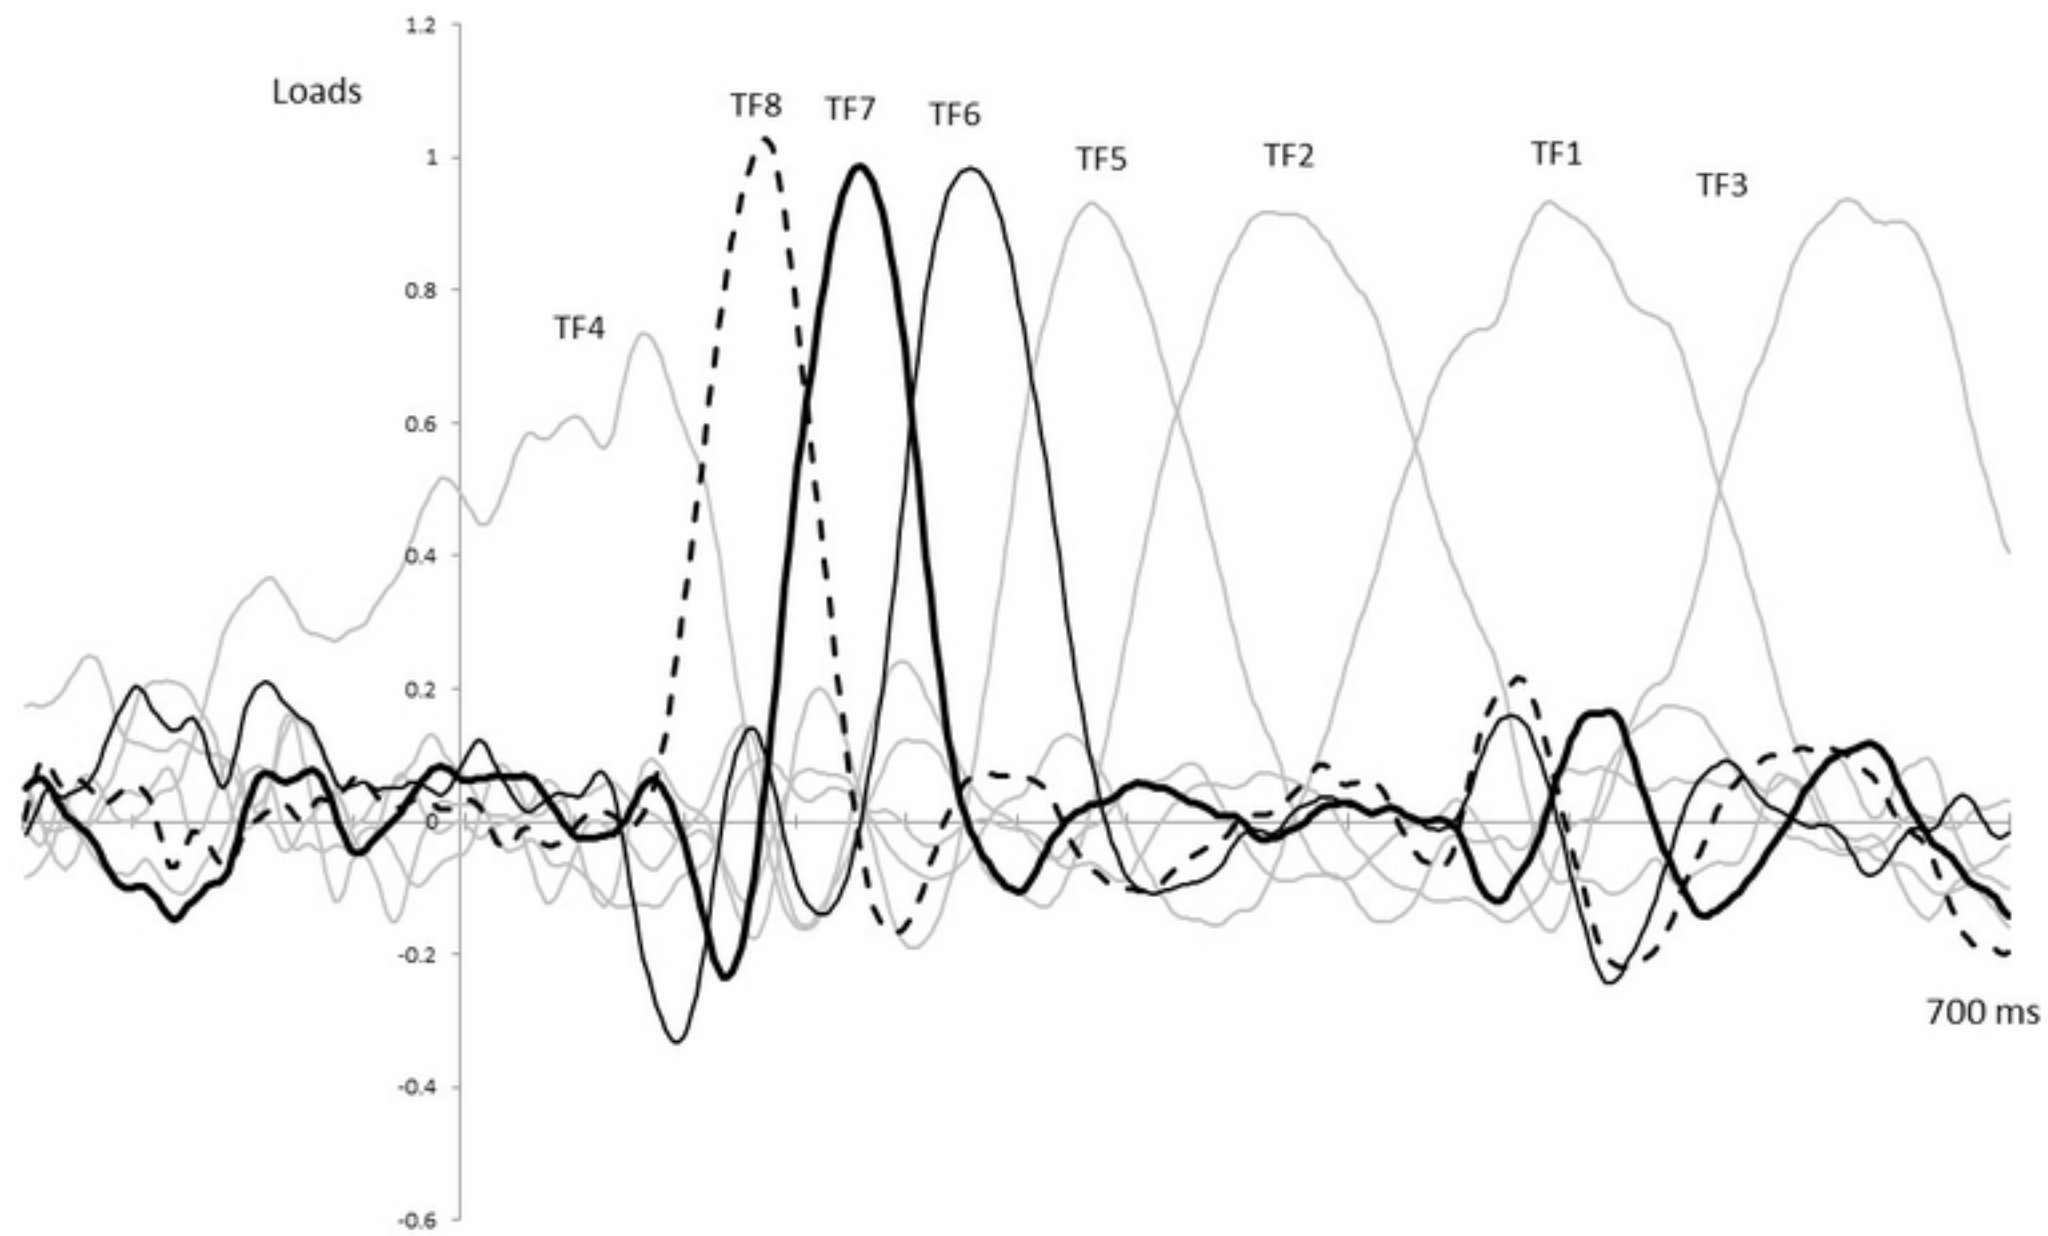

Figure 4



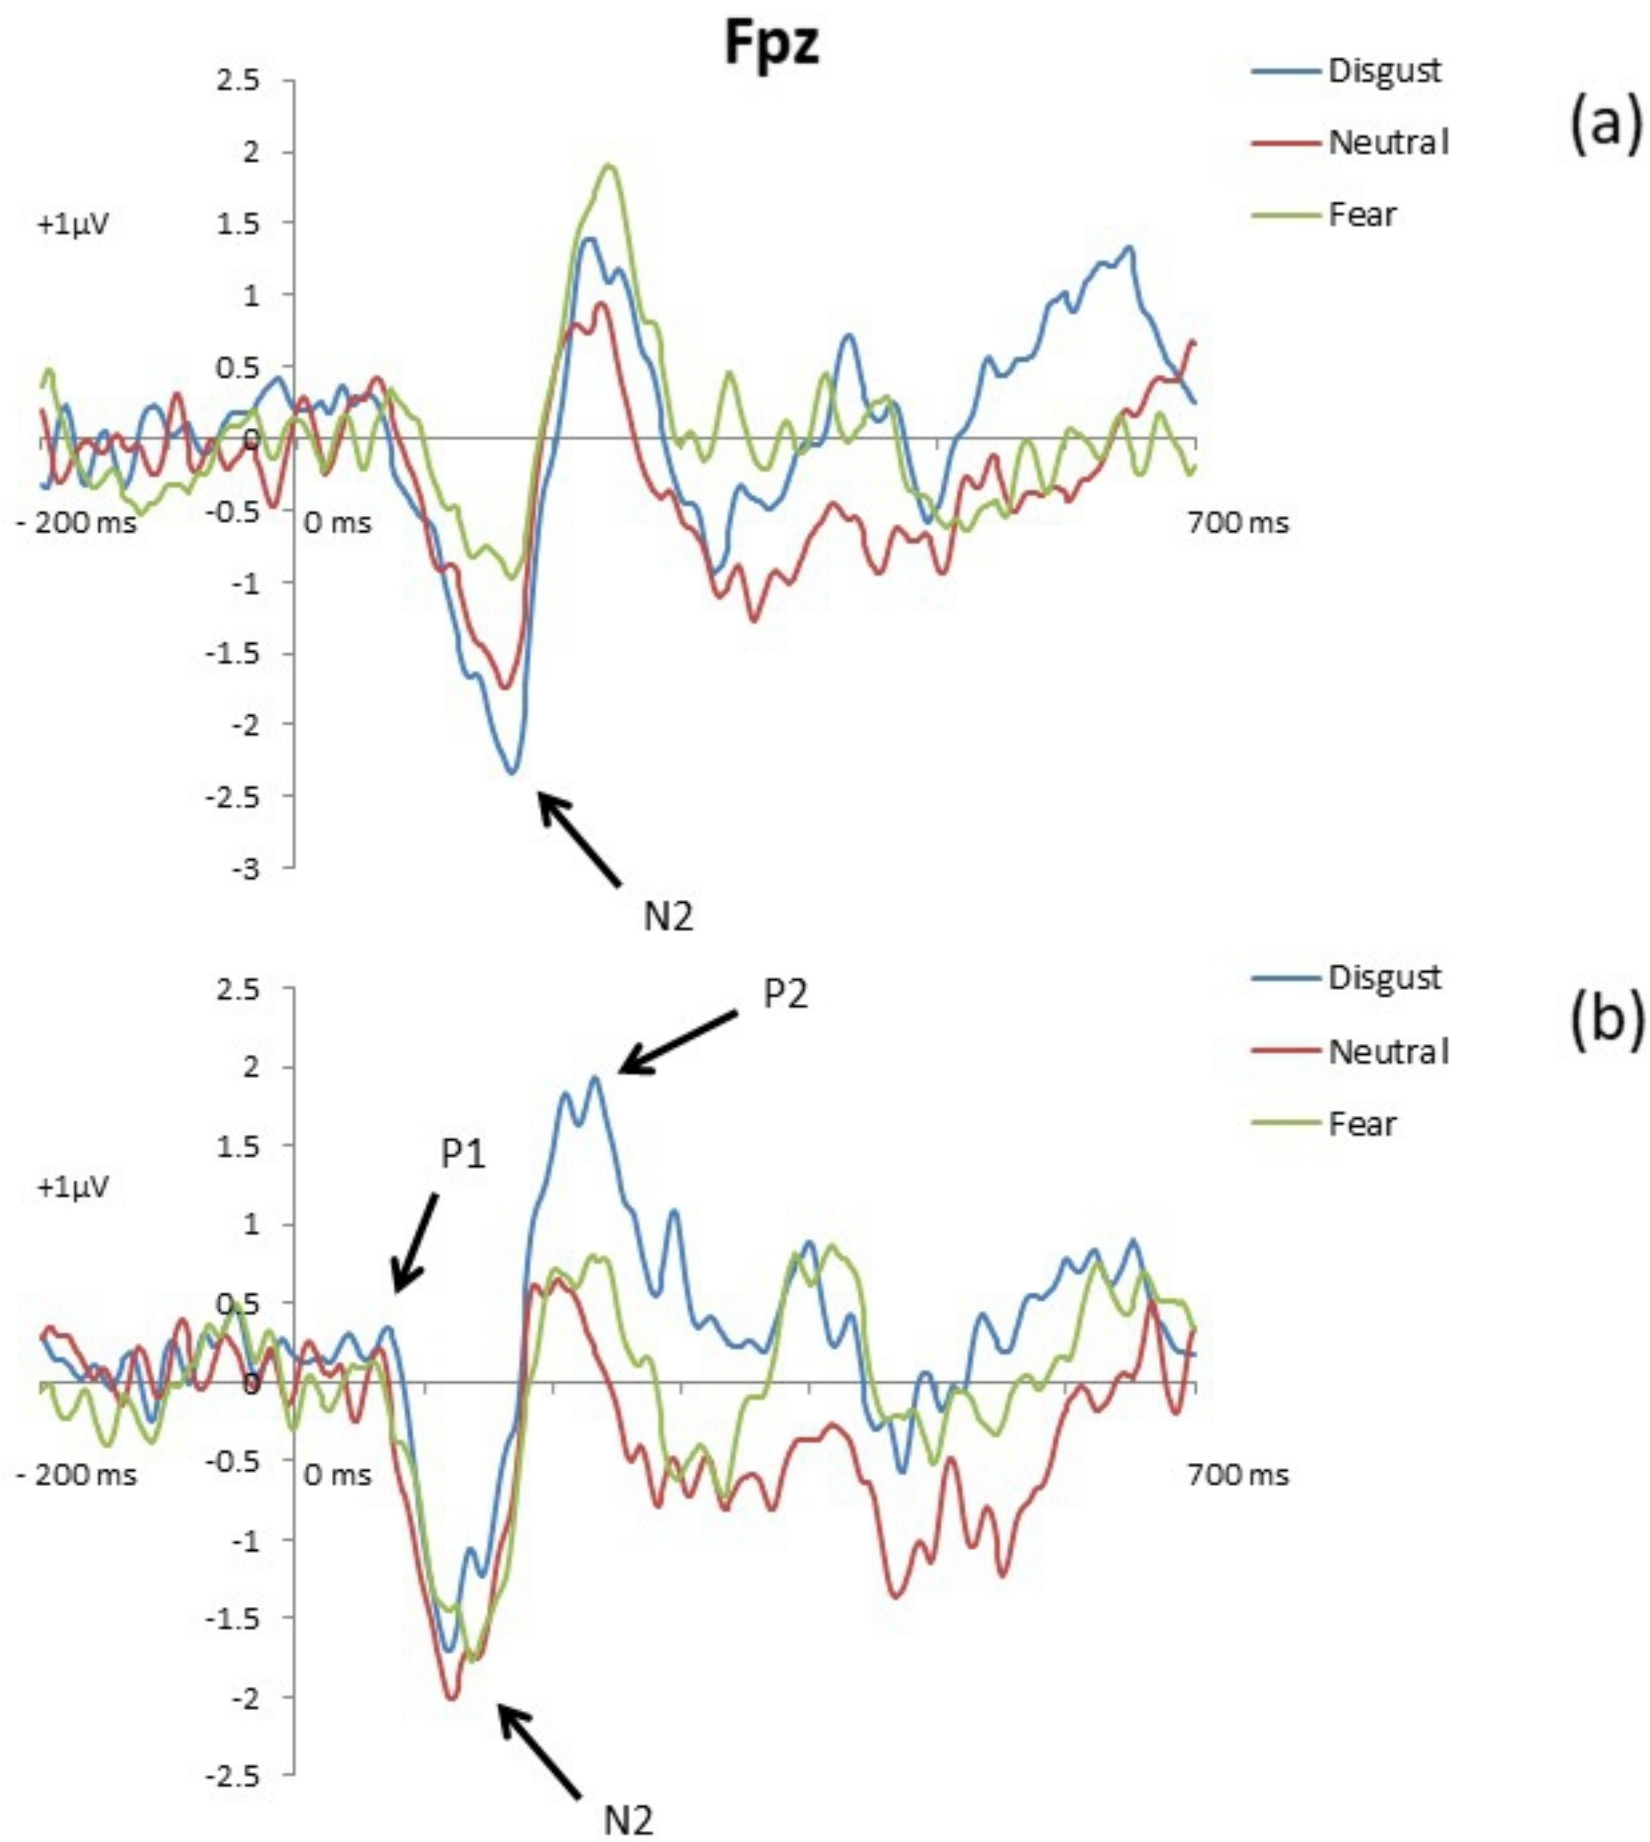

Figure 5

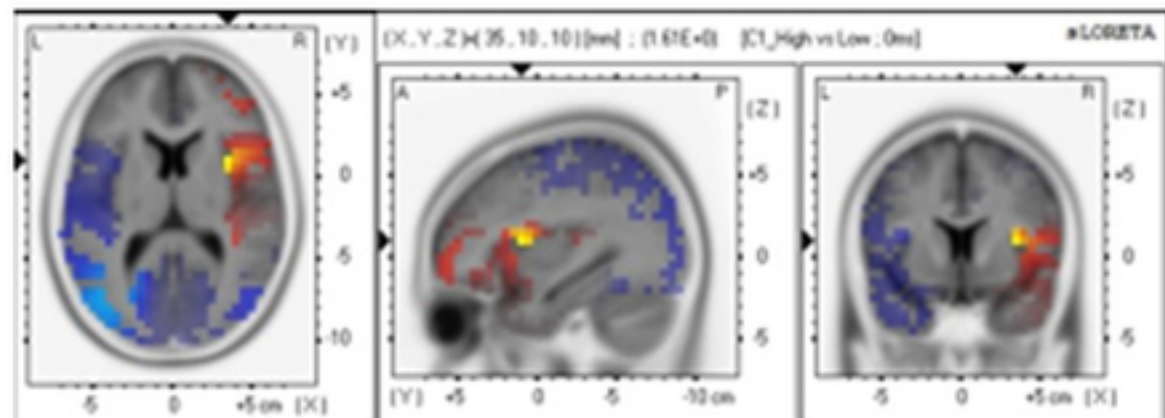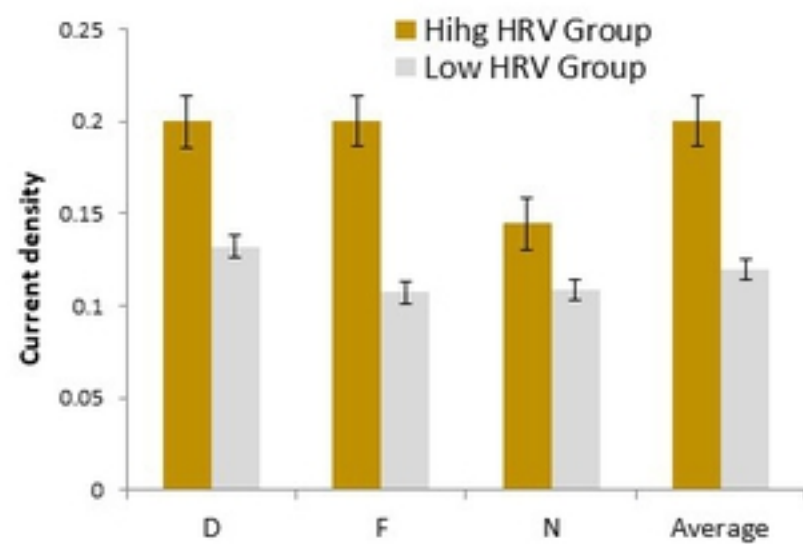

Figure 6
